# Supplementary material for: Strategy to prevent epitope masking in CAR.CD19+ B-cell leukemia blasts
Source: PubMed Central journal article supplement — J Immunother Cancer. 2021 Jun 16;9(6):e001514. doi: 10.1136/jitc-2020-001514 (PMC8211055; doi:10.1136/jitc-2020-001514), 2021-06-16
Supplement: jitc-2020-001514supp001.pdf [file jitc-2020-001514supp001.pdf]

## Supplementary Materials

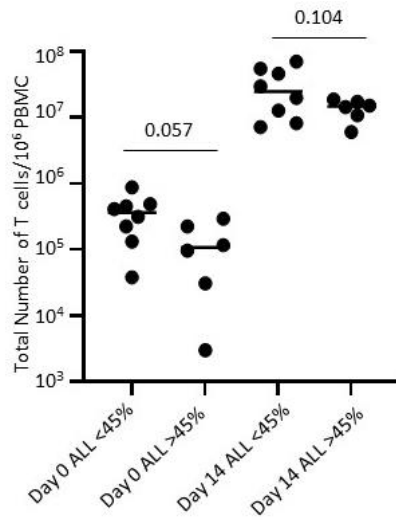

**Supplemental Figure 1. T cell numbers in SM and DP.** Graph representing the total number of T-cells in the starting material plated for manufacturing (Day 0) and at the end of production of the DP (Day+14) between the two subgroups of patients with either <45% or >45% of CD19+ B cells in SM.

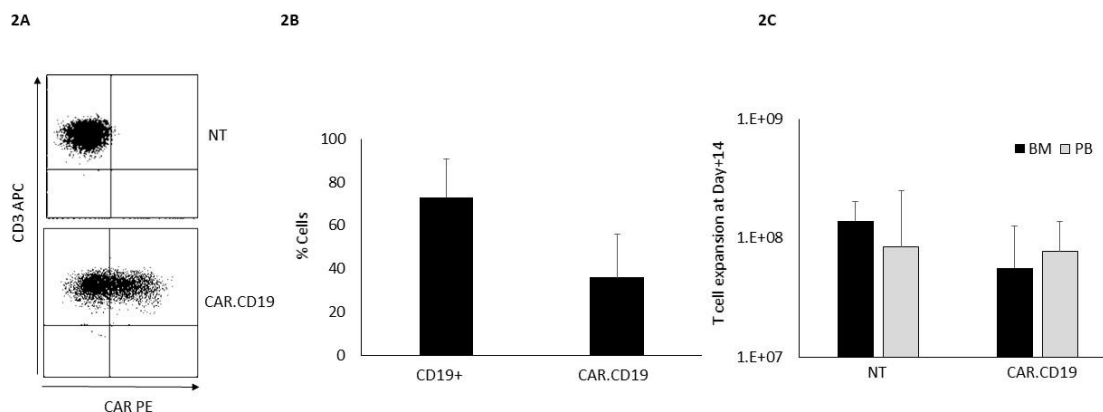

**Supplemental Figure 2. BM Patient-derived CAR.CD19 T-cells.** (A) Flow-cytometry analysis in a representative DP generated from BM mononuclear cells of a Bcp-ALL patient collected at the time of diagnosis. Upper panel A shows flow-cytometry analysis of CAR+ T-cells in the negative control sample of un-transduced (NT) T-cells, whereas bottom panel shows the analysis in CAR.CD19 genetically modified T-cells. (B) Average of the percentage of CD19+ leukemic blasts in the BM derived starting materials considered for CAR.CD19 T-cell manufacturing from Bcp-ALL patients at diagnosis and CAR+ T-cells in DPs generated from BM samples of Bcp-ALL patients (n=10). (C) Total cell collection at the end of production of un-transduced (NT) and CAR.CD19 T-cells derived from PBMCs of Bcp-ALL patients (n=15), and BM samples of Bcp-ALL patients (n=10), at the end of production. Data are expressed as average ± SD.

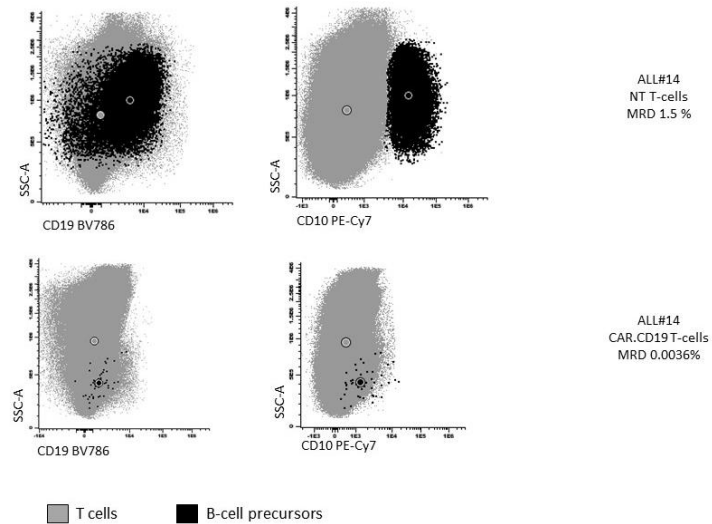

**Supplemental Figure 3. Flow-cytometry analysis of control un-transduced T-cells and CAR.CD19 T-cells from one representative Bcp-ALL patient.** Upper panels show flow-cytometric analysis of CD19 and CD10 B-cell markers in control un-transduced T-cells from ALL#14 patient revealing 1.5% of leukemic cells, whereas the contamination was significantly reduced in the CAR.CD19 T-cell sample manufactured from the same patient ALL#14 (0.0036% of leukemic cells).

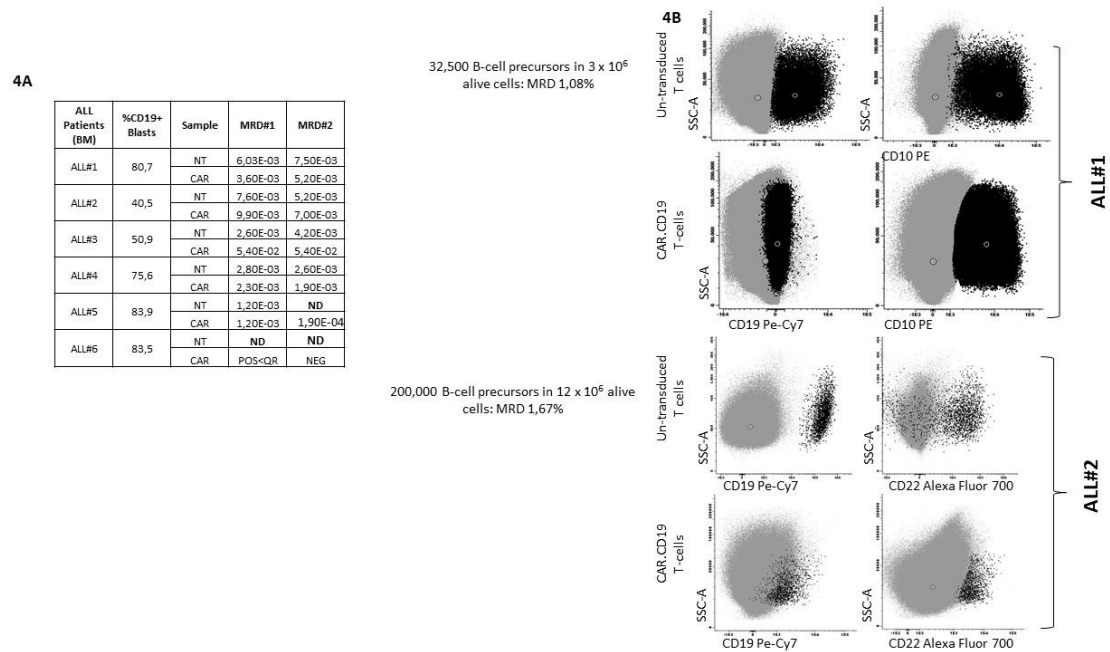

**Supplemental Figure 4. MRD analysis of DPs generated from BM raw materials of Bcp-ALL patients highly contaminated by leukaemia cells at diagnosis. (A)** Table shows data from each enrolled patient as regarding to the percentage of CD19+ leukaemia cells (MRD=1) in the patient-derived BM mononuclear cells used as starting raw material for the CAR-T cell manufacturing, and the value of MRD for two different Ig markers identified at the time of diagnosis in each single patient. MRD data were reported for both control un-transduced T-cell samples (NT) and CAR.CD19 T-cell samples (CAR). (C) Flow-cytometry analysis of B-cell markers in two BM derived DPs from ALL#1 and ALL#2 patients. Panels show the presence of leukaemia cells (black dots).

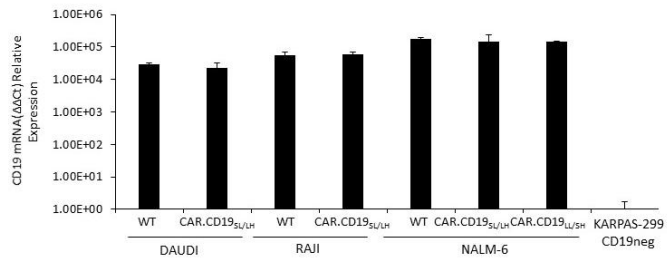

**Supplemental Figure 5. CD19 mRNA expression is not modulated in CAR+ tumor cell lines.** Quantitative Real-Time PCR (qRT-PCR) of CD19 mRNA expression in WT and CAR.CD19 positive tumor cell lines (WT and CAR.CD19<sub>SL/LH</sub> DAUDI and RAJI; WT, CAR.CD19<sub>SL/LH</sub>, CAR.CD19<sub>LL/SH</sub> NALM-6 cell lines). Karpas-299 cell line has been used as negative control. mRNA levels are shown as relative expression of CD19 mRNA versus ACT-B mRNA expression. Reactions were performed in triplicates. Data are represented as mean  $\pm$  SD.

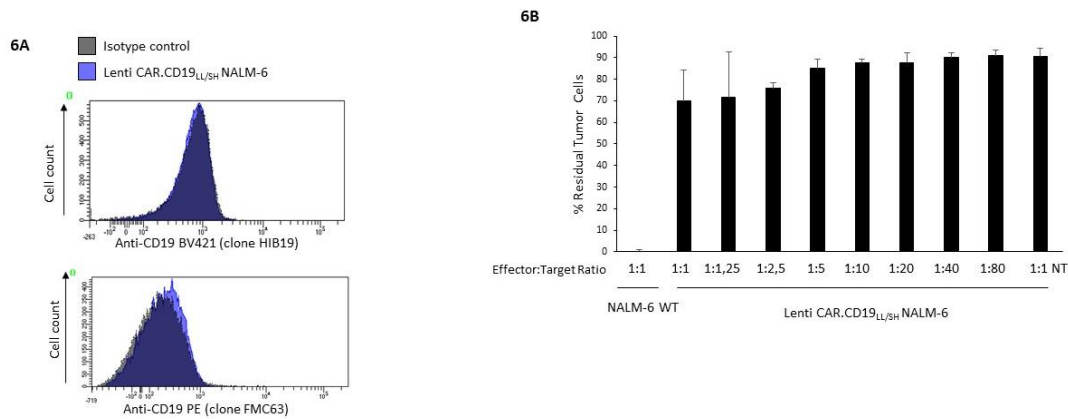

**Supplemental Figure 6. NALM-6 genetically modified with a lentiviral vector carrying CAR.CD19<sub>LL/SH</sub>.** (A) CD19 expression detected by flow-cytometry in NALM-6 cells genetically modified by lentiviral CAR.CD19<sub>LL/SH</sub> construct. Matched isotype staining is shown by grey histograms, whereas CD19 staining with anti-CD19 PE (clone FMC63) (top panel) or anti-CD19 BV421 (clone HIB19) (bottom panel) is shown by blue histograms. (B) 7 days co-culture assays of NALM-6 WT (white bar) and NALM-6 cells genetically modified by lentiviral CAR.CD19<sub>LL/SH</sub> construct (black bars) with CAR.CD19<sub>LL/SH</sub> T-cells. NALM-6 WT were used as control at 1:1 effector:target ratio while NALM-6 CAR+ cells were plated at the indicated effector:target ratios from 1:1 to 1:80. Data are expressed as average  $\pm$  SD. \* p-value= $<0.05$ , \*\* p-value= $<0.01$ , \*\*\* p-value= $<0.001$ . n=6

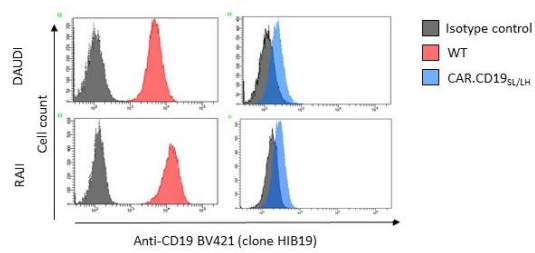

**Supplemental Figure 7. CD19 expression detected by flow-cytometry in DAUDI and RAJI tumor cell lines, WT or genetically modified by CAR.CD19.** Matched isotype staining is shown in grey histograms, whereas the specific CD19 staining (Clone HIB19) is shown by red histograms for WT cells and blue histograms for CAR.CD19<sub>SL/LH</sub> cells.

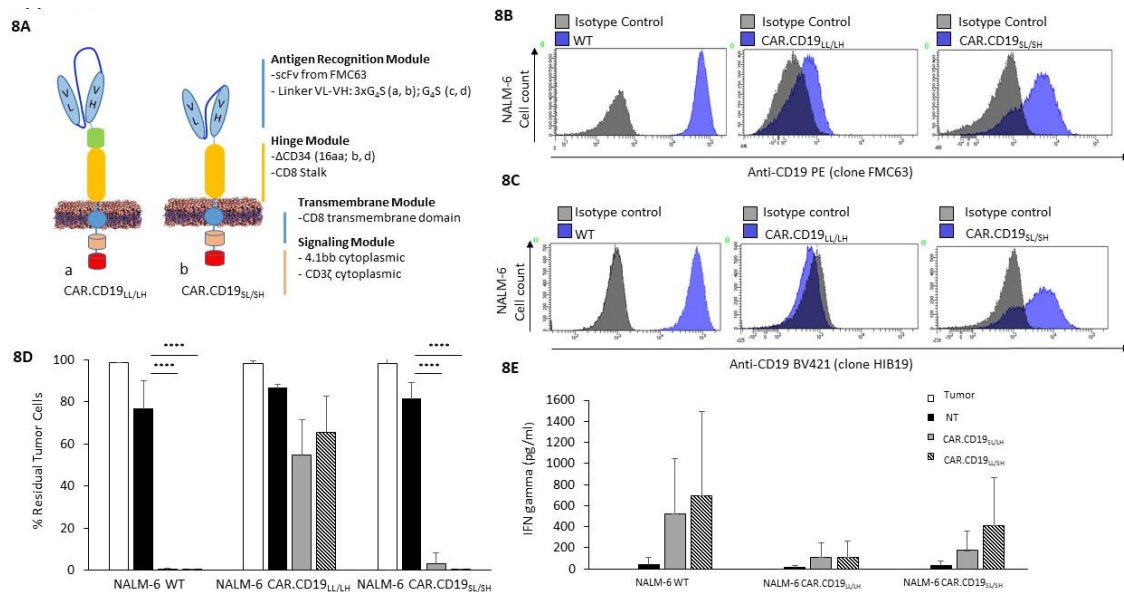

**Supplemental Figure 8. CAR.CD19 structure affects CD19 antigen *in cis* binding.** (A) Cartoons representing CAR.CD19<sub>LL/LH</sub> (a) and CAR.CD19<sub>SL/SH</sub> (b). (B-C) CD19 expression detected by flow-cytometry in NALM-6 cells, genetically modified by different CAR.CD19 constructs. Matched isotype staining is shown by grey histograms, whereas CD19 staining with anti-CD19 PE (clone FMC63) (B) or anti-CD19 BV421 (clone HIB19) (C) is shown by blue histograms for each CAR.CD19 modified NALM-6 cell lines. (D) 7 days co-culture assay of NALM-6 WT and CAR.CD19 genetically modified NALM-6 with NT (black bars), CAR.CD19<sub>LL/LH</sub> (grey bars) and CAR.CD19<sub>SL/SH</sub> (dotted bars) T-cells. Tumor alone is represented by white histograms. n=6. \* p-value=<0.05, \*\* p-value=<0.01, \*\*\* p-value=<0.001, \*\*\*\* p-value=<0.0001. (E) IFN- $\gamma$  production was measured after 24h of co-culture. Data from 6 HDs are expressed as mean  $\pm$  SD.



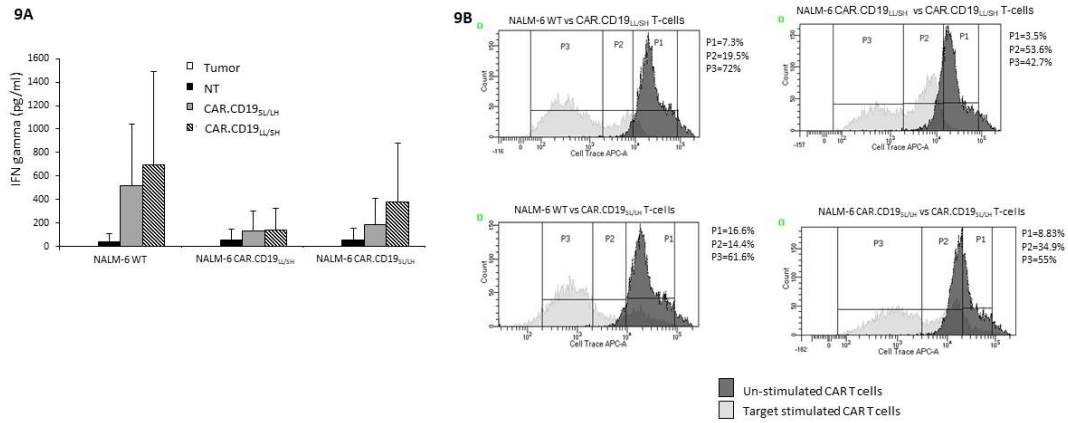

**Supplemental Figure 9. CAR.CD19 T-cells activation profile is similar beside the CAR configuration.** (A) IFN- $\gamma$  production was measured after 24h of co-culture of effector T-cells and NALM-6 WT, or NALM-6 genetically modified with CAR.CD19 constructs. Data from 6 different CAR T products generated from HDs are expressed as mean  $\pm$  SD. (B) CFSE Proliferation analysis representing the overlays of CAR T-cells unstimulated (dark grey) and stimulated with WT or CAR.CD19 modified NALM-6 cells (light grey).

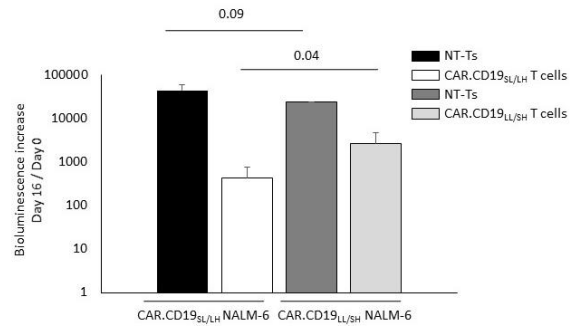

**Supplemental Figure 10. CAR.CD19<sup>SL/LH</sup> NALM-6 cells are controlled better than CAR.CD19<sup>LL/SH</sup> NALM-6 in the *in vivo* setting.** Histograms representing tumor bioluminescence differences at Day 16 (endpoint of *in vivo* experiment) between mice bearing CAR.CD19<sup>SL/LH</sup> and CAR.CD19<sup>LL/SH</sup> NALM-6 cells. Data are shown as increment Mean  $\pm$  SD of bioluminescence values of the two mice cohorts at Day 16 compared to Day 0.

| Patient     | IG/TR         | SR       | ASO primer                           | RQ primer | TaqMan Probe                 |              |                                                      |
|-------------|---------------|----------|--------------------------------------|-----------|------------------------------|--------------|------------------------------------------------------|
| ALL#1       | IGH VH4JH5    | 1.00E-05 | GTCGCCAATTTTCATTGGTAGTA              | jh5 rp2   | CAAGCTGAGTCTCCCTAAGT9GA      | jh1.2.4.5 tp | C CC T99TC AC CGTC TC C TCAGGTG                      |
|             | IGK VK2Kde    | 1.00E-05 | GCAAGTACACAATTAAGGAGAAGATAGT         | kde rp2   | ATATGCAAAAATGCGAGCTGC        | kde tp1      | AGCC CAGGGGCGAC TC C TCATGAGT                        |
| ALL#2       | IGH VH3JH6    | 1.00E-04 | TAGAGATCCGGCTTTTAAGTGAAGT            | jh6 rp    | GCAGAAAAAAGGCCCTAGAGT        | jh6 tp       | CACGGTCCACGTC TC C TCAGTAAAGAA                       |
|             | IGH VH3JH5    | 1.00E-05 | GCAGCACCCCTCAAGCA                    | jh5 rp2   | CAAGCTGAGTCTCCCTAAGT9GA      | jh1.2.4.5 tp | C CC T99TC AC CGTC TC C TCAGGTG                      |
| ALL#3       | IGH VH3JH4    | 1.00E-05 | TGTGCGAAAAGATCTTTTTATGGTGTAGCTATTCTT | jh4 rp    | CAGAGTTAAAAGCAGGAGAGAGGTTGT  | jh1.2.4.5 tp | C CC T99TC AC CGTC TC C TCAGGTG                      |
|             | TRD VD2DD3    | 1.00E-05 | GGTATCCCCCCCCACA                     | vd2 fp    | TGAAAAGAACCTGGCTGACTTAA      | vd2 tp       | AGACCCTTCATC TC TC TCTGATGGTCAAGTA                   |
| ALL#4       | TRB VB20JB2.7 | 1.00E-05 | GCCCCGACTAGCTAGTTTACGA               | jb2.7 rp  | GC TGGAAAGTGGGGA             | jb2.7 tp     | C GGGC AC C AGGC TC AC GGT                           |
|             | IGH VH3JH5    | 1.00E-04 | ACTGTCCCCGAGTTGTACTAATG              | jh5 rp2   | CAAGCTGAGTCTCCCTAAGT9GA      | jh1.2.4.5 tp | C CC T99TC AC CGTC TC C TCAGGTG                      |
| ALL#5       | IGH VH3JH6    | 1.00E-04 | TGCTATACCCGGCGGGTG                   | jh6 rp    | GCAGAAAAAAGGCCCTAGAGT        | jh6 tp       | CACGGTCCACGTC TC C TCAGTAAAGAA                       |
|             | TRD VD2DD3    | ND       | CCCGAGTAAGTCCGGTGGAGTC               | vd2 fp    | TGAAAAGAACCTGGCTGACTTAA      | vd2 tp       | AGACCCTTCATC TC TC TCTGATGGTCAAGTA                   |
| ALL#6       | TRA VD2JA29   | 1.00E-04 | GGTATCCCCCAGGAGAGCA                  | vd2 fp    | TGAAAAGAACCTGGCTGACTTAA      | vd2 tp       | AGACCCTTCATC TC TC TCTGATGGTCAAGTA                   |
|             | IGH VH3JH4    | 1.00E-04 | ATAGATGTGTACTACTGTGCGAGCGTACTA       | jh4 rp    | CAGAGTTAAAAGCAGGAGAGAGGTTGT  | jh1.2.4.5 tp | C CC T99TC AC CGTC TC C TCAGGTG                      |
| ALL#7       | IGH VH4JH4    | 1.00E-04 | TCCGGTGTATACACCTATCCCTTAA            | jh4 rp    | CAGAGTTAAAAGCAGGAGAGAGGTTGT  | jh1.2.4.5 tp | C CC T99TC AC CGTC TC C TCAGGTG                      |
|             | TRD VD2DD3    | 1.00E-04 | TGSGGTATCCGCCAGAGACA                 | vd2 fp    | TGAAAAGAACCTGGCTGACTTAA      | vd2 tp       | AGACCCTTCATC TC TC TCTGATGGTCAAGTA                   |
| ALL#8       | IGH DH3JH5    | 5.00E-04 | TGGGTATACTGGAACTACGCTGGTT            | jh5 rp2   | CAAGCTGAGTCTCCCTAAGT9GA      | jh1.2.4.5 tp | C CC T99TC AC CGTC TC C TCAGGTG                      |
| ALL#9       | IGH VH3JH4    | 1.00E-04 | GGATTTAAGTGGGATCTCCCTTA              | jh4 rp    | CAGAGTTAAAAGCAGGAGAGAGGTTGT  | jh1.2.4.5 tp | C CC T99TC AC CGTC TC C TCAGGTG                      |
|             | TRD VD2DD3    | 1.00E-04 | CCCTCCACTCCCG                        | vd2 fp    | TGAAAAGAACCTGGCTGACTTAA      | vd2 tp       | AGACCCTTCATC TC TC TCTGATGGTCAAGTA                   |
| ALL#10      | IGK VK2Kde    | 5.00E-04 | CAAGTACACATCGCTGGGA                  | kde rp2   | ATATGCAAAAATGCGAGCTGC        | kde tp1      | AGCC CAGGGGCGAC TC C TCATGAGT                        |
|             | IGH VH3JH6    | 1.00E-04 | CTGCGACCCACATCATGGA                  | jh6 rp    | GCAGAAAAAAGGCCCTAGAGT        | jh6 tp       | CACGGTCCACGTC TC C TCAGTAAAGAA                       |
| ALL#11      | IGH VH3JH6    | 1.00E-04 | TATAACAGCTACTTCTACACACGACCTA         | jh6 rp    | GCAGAAAAAAGGCCCTAGAGT        | jh6 tp       | CACGGTCCACGTC TC C TCAGTAAAGAA                       |
|             | TRD DD2DD3    | 1.00E-04 | CTAGCTGGAAACGTTAGGCT                 | dd3 rp1   | TTTTGCCCTGCAGTTTTGT          | dd3 tp1      | C GCACAGTGC TACAAMACC TAC AGAGACC TG                 |
| ALL#12      | TRD VD2DD3    | 1.00E-05 | GGTATCCCCCAGCTCGACA                  | vd2 fp    | TGAAAAGAACCTGGCTGACTTAA      | vd2 tp       | AGACCCTTCATC TC TC TCTGATGGTCAAGTA                   |
|             | IGH VH3JH4    | 1.00E-05 | OGGAGGGTAAATTAAGTGTAGTAGTGG_TTT      | jh4 rp    | CAGAGTTAAAAGCAGGAGAGAGGTTGT  | jh1.2.4.5 tp | C CC T99TC AC CGTC TC C TCAGGTG                      |
| ALL#13      | IGH VH3JH4    | 1.00E-05 | AAAAGGTTCTGGCGTTTAGGA                | jh4 rp    | CAGAGTTAAAAGCAGGAGAGAGGTTGT  | jh1.2.4.5 tp | C CC T99TC AC CGTC TC C TCAGGTG                      |
|             | TRD VD2DD3    | 1.00E-04 | GTCGTAACCTTCCCG                      | vd2 fp    | TGAAAAGAACCTGGCTGACTTAA      | vd2 tp       | AGACCCTTCATC TC TC TCTGATGGTCAAGTA                   |
| ALL#14      | IGH VH2JH4    | 1.00E-04 | AGTCTCTATCCGAGACCTCCAATT             | jh4 rp    | CAGAGTTAAAAGCAGGAGAGAGGTTGT  | jh1.2.4.5 tp | C CC T99TC AC CGTC TC C TCAGGTG                      |
|             | TRA VD2JA29   | 1.00E-04 | AATTGCGGAGTGGGGGTAT                  | vd2 fp    | TGAAAAGAACCTGGCTGACTTAA      | vd2 tp       | AGACCCTTCATC TC TC TCTGATGGTCAAGTA                   |
| ALL#15      | IGH VH4JH6    | 1.00E-05 | AGAGGAGGAGCCTACGGATATTTGA            | jh6 rp    | GCAGAAAAAAGGCCCTAGAGT        | jh6 tp       | CACGGTCCACGTC TC C TCAGTAAAGAA                       |
| ALL#16      | IGH VH3JH4    | 1.00E-05 | GCGAGCAACAACCTGATTTTGA               | jh4 rp    | CAGAGTTAAAAGCAGGAGAGAGGTTGT  | jh1.2.4.5 tp | C CC T99TC AC CGTC TC C TCAGGTG                      |
|             | TRG VG9JG1.3  | 1.00E-05 | GAACCAACTCCGAGGCT                    | vg9 fp    | GGCTTCCGTCAGGCAAA            | vg9 tp       | TAGGATACCTGAACGTC TACATCCAC TC ACC                   |
| ALL#17      | IGH VH2JH3    | 1.00E-04 | GTTAATAAGGGCCATCTGGG                 | jh3 rp    | AGGCAAGAAAGAACCTCTTAC        | jh3 tp       | C AAGGAC AATGGT ACC GTC TC TTCA                      |
| ALL#18      | IGH VH3JH3    | 1.00E-04 | AGAGGGGCTCCCTATGG                    | jh3 rp    | AGGCAAGAAAGAACCTCTTAC        | jh3 tp       | C AAGGAC AATGGT ACC GTC TC TTCA                      |
|             | IGH VH3JH4    | 1.00E-05 | AGCAGTGGCATGCCATTGA                  | jh4 rp    | CAGAGTTAAAAGCAGGAGAGAGGTTGT  | jh1.2.4.5 tp | C CC T99TC AC CGTC TC C TCAGGTG                      |
| ALL#19      | TRD VD2DD3    | 1.00E-05 | CTGCCCCCGCTACAA                      | dd3 rp3   | CTGC TTGCTGTGTTTGT TC CT     | dd3 tp2      | ATATC TC ACC C T99GTC C CATGCC                       |
| <b>Gene</b> |               |          | <b>Forward primer</b>                |           | <b>Reverse primer</b>        |              | <b>TaqMan Probe</b>                                  |
| IC9         |               |          | 5'-ACCAGCTGATGCCATCTC-3'             |           | 5'-CAGCTGCCCTGACTTTTGGATC-3' |              | 5'-5HEX/AGCC TGCC C/ZEN/AC ACC TTC TGACAT3/ABI-FQ-3' |

IG/TR= Immunoglobulin/TCR; SR= Sensitive Range; ASO=allele-specific oligonucleotide; RQ primer: Reverse primer.

**Supplemental Table 1. List of primers used in MRD detection by qRT-PCR.**

IG/TR=Immunoglobulin/TCR; SR=Sensitive Range; ASO=Allele-Specific Oligonucleotide.

| Peptide                    | Binding Alleles        | CAR Construct             |
|----------------------------|------------------------|---------------------------|
| <b>VT</b> VSSPAPR          | HLA-A11:01, HLA-A33:03 | Short Hinge no CD34       |
| <b>SV</b> <b>T</b> VSSPAPR | HLA-A33:03             | Short Hinge no CD34       |
| <b>G</b> SELPTQGTF         | HLA-B40:01             | Long Hinge including CD34 |
| <b>ST</b> NVSPAPR          | HLA-A11:01, HLA-A33:03 | Long Hinge including CD34 |

**Supplemental Table 2. List of immunogenic peptides in CAR constructs including CD34 domain.** Peptides predicted to be immunogenic are reported in the first column. The amino acids in bold and plain text are derived from different regions in the construct. In column 2, we show all the alleles that are predicted to present such peptides, with a rank score of 0.5 or less. The source construct of the peptide is reported in column 3.
